# Supplementary material for: Feasibility and Efficacy of Online Neuropsychological Assessment
Source: MDPI journal article supplement (doi:10.3390/s23115160), 2023-05-29
Supplement: s1 [file s1]

# Supplementary Materials

## Feasibility and Efficacy of Online Neuropsychological Assessment

**Table S1: Between-group comparisons for Experiment 1 on the MoCA. Mean  $\pm$  SD.**

|             | Control        | PD             | CA             |                           | T score | T score<br>df | P value | P Adj. | Effect<br>Size |
|-------------|----------------|----------------|----------------|---------------------------|---------|---------------|---------|--------|----------------|
| <b>MoCA</b> | 27.8 $\pm$ 1.9 | 27.0 $\pm$ 2.6 | 26.0 $\pm$ 4.4 | <b>Control<br/>vs. PD</b> | -2.01   | 110           | 0.047   | 0.141  | -0.37          |
|             |                |                |                | <b>Control<br/>vs. CA</b> | -3.73   | 97            | <0.001  | <0.001 | -0.73          |
|             |                |                |                | <b>CA vs. PD</b>          | 1.97    | 131           | 0.051   | 0.155  | 0.34           |

**Table S2. Comparison between scores for our Experiment 2 cohorts and literature values.**

|                      | Cohort<br>Mean | Literature<br>Mean | Statistical test<br>(Z/t) | df | P-value | Effect Size |
|----------------------|----------------|--------------------|---------------------------|----|---------|-------------|
| <b>Anxiety</b>       |                |                    |                           |    |         |             |
| Control              | 52.0           | 48.5               | 0.36                      | 15 | 0.719   | 0.36        |
| PD                   | 54.4           | 50.6               | 1.40                      | 14 | 0.183   | 0.39        |
| <b>Depression</b>    |                |                    |                           |    |         |             |
| Control              | 49.6           | 49.3               | 0.03                      | 15 | 0.976   | 0.04        |
| PD                   | 53.0           | 48.0               | 1.71                      | 14 | 0.109   | 0.51        |
| <b>ISEL-12</b>       |                |                    |                           |    |         |             |
| Control              | 37.1           | 39.8               | -0.40                     | 15 | 0.689   | 0.39        |
| PD                   | 37.5           | 35.3               | 0.38                      | 14 | 0.704   | 1.24        |
| <b>Neuroticism</b>   |                |                    |                           |    |         |             |
| Control              | 60.6           | 61.7               | -0.32                     | 15 | 0.755   | -0.07       |
| <b>Extraversion</b>  |                |                    |                           |    |         |             |
| Control              | 80.4           | 78.9               | 0.69                      | 15 | 0.498   | 0.13        |
| <b>Openness</b>      |                |                    |                           |    |         |             |
| Control              | 90.3           | 83.11              | 3.20                      | 15 | 0.006   | 0.72        |
| <b>Agreeableness</b> |                |                    |                           |    |         |             |

|                          |      |       |        |    |       |       |
|--------------------------|------|-------|--------|----|-------|-------|
| Control                  | 94.9 | 93.32 | 0.593  | 15 | 0.562 | 0.14  |
| <b>Conscientiousness</b> |      |       |        |    |       |       |
| Control                  | 93.4 | 93.81 | -0.123 | 15 | 0.903 | -0.03 |

**Table S3. Between-group comparisons for the online measures obtained in Experiment 2. Mean  $\pm$  SD (range). P Adj. indicates correction for multiple comparisons.**

|                          | Control                     | PD                          | CA                           | Comparison            | T score | df | P-value | P Adj. | Effect Size |
|--------------------------|-----------------------------|-----------------------------|------------------------------|-----------------------|---------|----|---------|--------|-------------|
| <b>PROMIS Anxiety</b>    | 52.0 $\pm$ 9.2<br>(36-68)   | 54.4 $\pm$ 10.1<br>(36-73)  | 54.0 $\pm$ 8.9<br>(36-73)    | <b>Control vs. PD</b> | 0.68    | 29 | 0.499   | 1      | 0.24        |
|                          |                             |                             |                              | <b>Control vs. CA</b> | 0.65    | 32 | 0.522   | 1      | 0.22        |
|                          |                             |                             |                              | <b>CA vs. PD</b>      | -0.12   | 31 | 0.907   | 1      | 0.04        |
| <b>PROMIS Depression</b> | 49.6 $\pm$ 8.0<br>(37-66)   | 53.1 $\pm$ 10.8<br>(37-68)  | 54.0 $\pm$ 9.3<br>(37-69)    | <b>Control vs. PD</b> | 0.97    | 29 | 0.343   | 1      | 0.25        |
|                          |                             |                             |                              | <b>Control vs. CA</b> | 1.48    | 32 | 0.149   | 0.792  | 0.51        |
|                          |                             |                             |                              | <b>CA vs. PD</b>      | -0.11   | 31 | 0.913   | 1      | 0.04        |
| <b>ISEL-12</b>           | 37.1 $\pm$ 6.8<br>(25-46)   | 37.5 $\pm$ 7.6<br>(27-48)   | 37.1 $\pm$ 6.8<br>(24-48)    | <b>Control vs. PD</b> | 0.14    | 29 | 0.893   | 1      | 0.05        |
|                          |                             |                             |                              | <b>Control vs. CA</b> | -0.00   | 32 | 0.995   | 1      | -0.00       |
|                          |                             |                             |                              | <b>CA vs. PD</b>      | -0.14   | 31 | 0.887   | 1      | 0.05        |
| <b>Neuroticism</b>       | 60.6 $\pm$ 14<br>(44-86)    | 65.0 $\pm$ 17.4<br>(38-96)  | 67.1 $\pm$ 14.0<br>(44-103)  | <b>Control vs. PD</b> | 0.79    | 29 | 0.438   | 1      | 0.28        |
|                          |                             |                             |                              | <b>Control vs. CA</b> | 1.34    | 32 | 0.190   | 0.630  | 0.46        |
|                          |                             |                             |                              | <b>CA vs. PD</b>      | 0.377   | 31 | 0.709   | 1      | -0.13       |
| <b>Extraversion</b>      | 80.4 $\pm$ 8.8<br>(55-89)   | 70.5 $\pm$ 15.2<br>(44-92)  | 68.0 $\pm$ 14.8<br>(39-90)   | <b>Control vs. PD</b> | -2.29   | 29 | 0.032   | 0.080  | -0.83       |
|                          |                             |                             |                              | <b>Control vs. CA</b> | -3.02   | 32 | 0.005   | 0.023  | -1.02       |
|                          |                             |                             |                              | <b>CA vs. PD</b>      | -0.48   | 31 | 0.636   | 1      | 0.17        |
| <b>Openness</b>          | 90.3 $\pm$ 10.4<br>(73-108) | 83.9 $\pm$ 10.4<br>(66-103) | 80.78 $\pm$ 13.6<br>(47-110) | <b>Control vs. PD</b> | -2.05   | 29 | 0.049   | 0.222  | -0.74       |
|                          |                             |                             |                              | <b>Control vs. CA</b> | -2.57   | 32 | 0.015   | 0.038  | -0.88       |
|                          |                             |                             |                              | <b>CA vs. PD</b>      | -0.76   | 31 | 0.435   | 0.984  | 0.26        |

|                          |                         |                         |                         |                       |       |    |       |       |       |
|--------------------------|-------------------------|-------------------------|-------------------------|-----------------------|-------|----|-------|-------|-------|
| <b>Agreeableness</b>     | 94.9 ± 10.4<br>(74-107) | 94.8 ± 11.2<br>(81-110) | 100.3 ± 8.1<br>(84-114) | <b>Control vs. PD</b> | -0.02 | 29 | 0.985 | 1     | -0.00 |
|                          |                         |                         |                         | <b>Control vs. CA</b> | 1.66  | 32 | 0.107 | 0.837 | 0.58  |
|                          |                         |                         |                         | <b>CA vs. PD</b>      | 1.60  | 31 | 0.121 | 0.840 | -0.57 |
| <b>Conscientiousness</b> | 93.4 ± 12.0<br>(70-114) | 90.3 ± 17.2<br>(55-113) | 94.2 ± 8.9<br>(74-106)  | <b>Control vs. PD</b> | -0.59 | 29 | 0.558 | 1     | -0.21 |
|                          |                         |                         |                         | <b>Control vs. CA</b> | 0.198 | 32 | 0.844 | 1     | 0.07  |
|                          |                         |                         |                         | <b>CA vs. PD</b>      | 0.804 | 31 | 0.431 | 0.738 | -0.29 |

Table S4. Demographic comparison for Experiment 1.

|                       | <b>Age</b> | <b>Education</b> |                          | <b>%Women</b> |
|-----------------------|------------|------------------|--------------------------|---------------|
| <b>PD vs. Control</b> |            |                  |                          |               |
| <b>diff of means</b>  | 17.06      | 1.019            | <b>chi-squared</b>       | 1.238         |
| <b>SE</b>             | 2.04       | 0.424            | <b>p value</b>           | 0.266         |
| <b>t</b>              | 8.34       | 2.406            | <b>chi-squared Yates</b> | 0.836         |
| <b>p-value</b>        | 7.53E-12   | 0.018            | <b>p-value Yates</b>     | 0.361         |
| <b>CD vs. Control</b> |            |                  |                          |               |
| <b>diff of means</b>  | 9.37       | 0.302            | <b>chi-squared</b>       | 0.0103        |
| <b>SE</b>             | 2.507      | 0.459            | <b>p value</b>           | 0.919         |
| <b>t</b>              | 3.74       | 0.658            | <b>chi-squared Yates</b> | 0.012         |
| <b>p-value</b>        | <0.001     | 0.512            | <b>p-value Yates</b>     | 0.914         |

Table S5. Demographic comparison for Experiment 2.

|                       | Age    | Education |                          | %Women |
|-----------------------|--------|-----------|--------------------------|--------|
| <b>PD vs. Control</b> |        |           |                          |        |
| <b>diff of means</b>  | 11.63  | 0.469     | <b>chi-squared</b>       | 4.500  |
| <b>SE</b>             | 3.476  | 0.696     | <b>p value</b>           | 0.034  |
| <b>t</b>              | 3.34   | 0.67      | <b>chi-squared Yates</b> | 3.125  |
| <b>p-value</b>        | 0.002  | 0.506     | <b>p-value Yates</b>     | 0.077  |
| <b>CD vs. Control</b> |        |           |                          |        |
| <b>diff of means</b>  | -2.417 | -0.299    | <b>chi-squared</b>       | 1.001  |
| <b>SE</b>             | 3.525  | 0.784     | <b>p value</b>           | 0.317  |
| <b>t</b>              | -0.69  | -0.38     | <b>chi-squared Yates</b> | 0.355  |
| <b>p-value</b>        | 0.498  | 0.707     | <b>p-value Yates</b>     | 0.551  |
